# Supplementary material for: Anastomotic Leak in Ovarian Cancer Cytoreduction Surgery: A Systematic Review and Meta-Analysis
Source: MDPI journal article supplement (doi:10.3390/cancers14215464), 2022-11-07
Supplement: s1 [file s1]

## Supplementary material S1

### Medline search strategy

- 1 Ovarian Neoplasms/
- 2 (ovarian tumo?r\* or ovarian cancer\* or ovarian neoplasm\*).mp
- 3 Cytoreduction Surgical Procedures/
- 4 (Cytoreduction Surger\* or Ovarian cytoreduction Surger\*).mp
- 5 Debulking procedure\*.mp
- 6 (Ovarian cancer surger\* or primary advanced ovarian cancer surger\*).mp
- 7 Anastomotic Leak/
- 8 Anastomotic leak\*.mp
- 9 (Anastomosis Leak\* or Anastomotic Leakage\*).mp
- 10 Colon/
- 11 (Bowel\* or Colon\* or large bowel\* or small bowel\*).mp
- 12 (recto-sigmoid and colorectal resection).mp
- 13 (recto-sigmoid or colorectal resection).mp
- 14 Pelvic Exenteration/
- 15 pelvic exenteration\*.mp
- 16 1 or 2
- 17 3 or 4 or 5 or 6
- 18 7 or 8 or 9
- 19 10 or 11 or 12 or 13 or 14 or 15
- 20 16 and 17 and 18 and 19

### Embase search strategy

- 1 ovary cancer/
- 2 (ovarian tumo?r\* or ovarian cancer\* or ovarian neoplasm\*)
- 3 cytoreductive surgery/
- 4 (Cytoreduction Surger\* or Ovarian cytoreduction Surger\*).mp
- 5 Debulking procedure\*.mp
- 6 (Ovarian cancer surger\* or primary advanced ovarian cancer surger\*).mp
- 7 anastomosis leakage/
- 8 Anastomotic leak\*.mp
- 9 Anastomosis Leak\*.mp
- 10 colon/
- 11 intestine/
- 12 large intestine/
- 13 small intestine/
- 14 (Bowel\* or Colon\* or large bowel\* or small bowel\*).mp
- 15 (recto-sigmoid and colorectal resection).mp
- 16 (recto-sigmoid or colorectal resection).mp
- 17 pelvis exenteration/
- 18 Pelvic Exenteration\*.mp
- 19 1 or 2
- 20 3 or 4 or 5 or 6

- 21 7 or 8 or 9
- 22 10 or 11 or 12 or 13 or 14 or 15 or 16 or 17 or 18
- 23 19 and 20 and 21 and 22
